# Supplementary material for: The effect of membrane fluidity on FRET parameters: an energy transfer study inside small unilamellar vesicle
Source: Royal Society of Chemistry journal article supplement (doi:10.1039/c0cp01925a), 2010-12-20
Supplement: c0cp01925a.pdf [file c0cp01925a.pdf]

Supporting information:

The lateral diffusion constant ( $D_L$ ) of the fluorescent probe molecule have been calculated by the following procedure:

By using eq (i) we have calculated  $\tau_m$  value;  $\tau_m = \frac{4\pi\eta r_h^3}{3KT} \dots (i)$ , where  $\eta$ =viscosity of the medium (water),  $r_h$ = hydrodynamic radius of the SUV,  $K$ = Boltzmann constant,  $T$ =absolute temperature,  $\tau_1$  and  $\tau_2$  are fast and slow component of anisotropy decay ;

Again, by using the value of  $\tau_m$ , we have obtained the  $\tau_D$  value with the help of eq. (ii);

$\frac{1}{\tau_D} = \frac{1}{\tau_2} + \frac{1}{\tau_m} \dots (ii)$  where  $(\tau_m)$  =time constant for overall rotation of the vesicles and  $(\tau_D)$  lateral diffusion of the probe.

Lastly we have obtained the  $D_L$  value by using the  $\tau_D$  and  $r_h$  values with the help of eq. (iii);

$$D_L = \frac{r_h^2}{6\tau_D} \dots (iii)$$
